# Supplementary material for: Comprehensive Analysis of VCAN Expression Profiles and Prognostic Values in HCC
Source: Frontiers journal article supplement (doi:10.3389/fgene.2022.900306), 2022-06-24
Supplement: Data_Sheet_1.PDF [file Data_Sheet_1.PDF]

**Supplementary Table 1**

|                              |                                                                                                                   |                                                                                                                                                                 |
|------------------------------|-------------------------------------------------------------------------------------------------------------------|-----------------------------------------------------------------------------------------------------------------------------------------------------------------|
| TCGAportal                   | <a href="http://www.tcgaportal.org">www.tcgaportal.org</a>                                                        | To investigate the expression of VCAN in human tissues                                                                                                          |
| Human protein Atlas          | <a href="https://www.proteinatlas.org/">https://www.proteinatlas.org/</a>                                         | To detect VCAN's distribution and suHCCCellular localization                                                                                                    |
| UALCAN                       | <a href="http://ualcan.path.uab.edu/">http://ualcan.path.uab.edu/</a>                                             | To analyze the VCAN mRNA expression in different races, ages, molecular subtypes of HCC patients                                                                |
| KaplanMeier Plotter          | <a href="http://kmplot.com/analysis/index.php?p=background">http://kmplot.com/analysis/index.php?p=background</a> | To analyzed the correlations between VCAN mRNA expression and RFS as well as OS                                                                                 |
| Cistrome DB Toolkit database | <a href="http://dbtoolkit.cistrome.org">http://dbtoolkit.cistrome.org</a>                                         | Selected the TF of VCAN - FOXM1                                                                                                                                 |
| MEXPRESS                     | <a href="https://mexpress.be/">https://mexpress.be/</a>                                                           | To unearth the methylation details of VCAN as well as the relationship between VCAN mRNA expression and different clinical characteristics of HCC               |
| GEPIA2                       | <a href="http://gepia2.cancer-pku.cn/#index">http://gepia2.cancer-pku.cn/#index</a>                               | To assess the correlations between genes                                                                                                                        |
| TargetScanHuman              | <a href="http://www.targetscan.org/vert_71/">http://www.targetscan.org/vert_71/</a>                               | To predict the miRNAs related to VCAN                                                                                                                           |
| starBase v3.0                | <a href="http://starbase.sysu.edu.cn/index.php">http://starbase.sysu.edu.cn/index.php</a>                         | To predict the miRNAs related to VCAN; To perform circRNAs prediction, survival analysis of miRNAs as well as correlation analysis between miRNAs and VCAN mRNA |
| Metascape                    | <a href="http://metascape.org/gp/index.html#/main/step1">http://metascape.org/gp/index.html#/main/step1</a>       | To obtained the heatmap and network of enrichment terms related to VCAN                                                                                         |
| STRING                       | <a href="https://string-db.org/cgi/input.pl">https://string-db.org/cgi/input.pl</a>                               | To obtain the interaction network between VCAN and other important proteins                                                                                     |
| DISIDB                       | <a href="http://cis.hku.hk/TISIDB/index.php">http://cis.hku.hk/TISIDB/index.php</a>                               | To analyze the correlations between expressions of VCAN mRNA and 3                                                                                              |

|  |  |                         |
|--|--|-------------------------|
|  |  | kinds of immune factors |
|--|--|-------------------------|
